# Supplementary material
Source: Springer Nature journal article supplement (https://www.springermedizin.de/resource/supplementary/12885_2013_4632_MOESM2_ESM.pdf/9466884)

**A**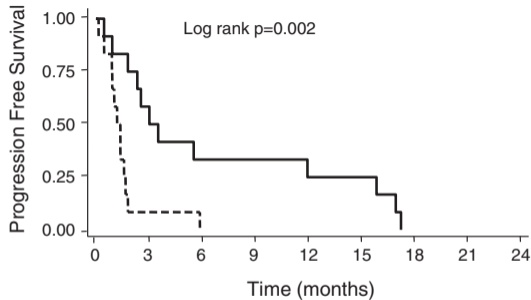

N at risk

|             |    |   |   |   |   |   |   |   |   |
|-------------|----|---|---|---|---|---|---|---|---|
| ECOG PS 0-1 | 12 | 7 | 4 | 4 | 3 | 3 | 0 | 0 | 0 |
| ECOG PS 2-3 | 12 | 1 | 0 | 0 | 0 | 0 | 0 | 0 | 0 |

**B**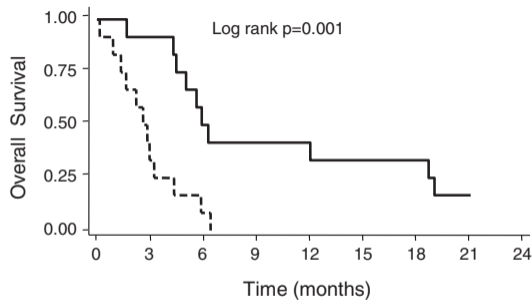

N at risk

|             |    |    |   |   |   |   |   |   |   |
|-------------|----|----|---|---|---|---|---|---|---|
| ECOG PS 0-1 | 12 | 11 | 6 | 5 | 5 | 4 | 4 | 1 | 0 |
| ECOG PS 2-3 | 12 | 4  | 1 | 0 | 0 | 0 | 0 | 0 | 0 |

Supplement: MOESM2 [file 9466884]
